# Supplementary material for: Structural reconfiguration of interacting multi-particle systems through parametric pumping
Source: Springer Nature journal article supplement (doi:10.1038/s41467-025-59631-3), 2025-05-19
Supplement: MOESM2 [file 41467_2025_59631_MOESM2_ESM.pdf › 41467_2025_59631_MOESM2_ESM.pdf]

## **Description of Additional Supplementary Files**

### **File name: Supplementary Movie 1**

**Description: Parametric pumping and structure control of levitated particles.** Demonstration of parametric pumping of a levitated 2-particle 'molecule', destabilizing a levitated cluster of five particles, controlling the transition between the pentagon and the cross structure, and switching between the two configurations on the fly.

### **File name: Supplementary Movie 2**

**Description: Parametric pumping and shape control of a levitated granular raft.** Demonstration of parametric pumping to activate bulk vibration modes in a levitated granular raft comprising hundreds of particles, and the frequency dependence of terminal raft size after 20 pump-quench cycles with different pumping frequencies.
